# Supplementary material for: CanScreen5, a global repository for breast, cervical and colorectal cancer screening programs
Source: Springer Nature journal article supplement (doi:10.1038/s41591-023-02315-6), 2023-04-27
Supplement: MOESM1 [file 41591_2023_2315_MOESM1_ESM.pdf]

# CanScreen5, a global repository for breast, cervical and colorectal cancer screening programs

---

In the format provided by the  
authors and unedited

## Supplementary information

**Supplementary table S1:** Values of selected performance indicators for breast cancer screening programmes providing data to CanScreen5

|                     | Reporting year | Screening test | Screening interval (years) | Age group for which data has been collected (years) | Number of participants screened | Examination coverage (%) | Proportion advised further assessment (%) | Further assessment participation rate (%) | Detection rate of CIS (/1,000) | Detection rate of invasive cancer (/1,000) | PPV to detect CIS & invasive cancer (%) |
|---------------------|----------------|----------------|----------------------------|-----------------------------------------------------|---------------------------------|--------------------------|-------------------------------------------|-------------------------------------------|--------------------------------|--------------------------------------------|-----------------------------------------|
| <b>Africa</b>       |                |                |                            |                                                     |                                 |                          |                                           |                                           |                                |                                            |                                         |
| Morocco             | 2019           | CBE            | 2                          | 40-69                                               | 1,515,586                       | 56.2                     | 2.4                                       | 39.7                                      | NA                             | 0.9                                        | 9.7 <sup>#</sup>                        |
| Mozambique          | 2020           | CBE            | 1                          | 25-45                                               | 2,453,675                       | 54.9                     | 1.0                                       | NA                                        | NA                             | NA                                         | NA                                      |
| <b>Asia</b>         |                |                |                            |                                                     |                                 |                          |                                           |                                           |                                |                                            |                                         |
| Bangladesh          | 2019           | CBE            | 1                          | 30+                                                 | 384,267                         | 1.7                      | 2.8                                       | NA                                        | NA                             | NA                                         | NA                                      |
| Japan               | 2017           | Mx             | 2                          | 40+                                                 | 3,087,781                       | 15.1                     | 6.0                                       | 92.9*                                     | 0.4                            | 2.8                                        | 5.7                                     |
| Republic of Korea   | 2016           | Mx             | 2                          | 40-79                                               | 3,712,924                       | 56.7                     | 14.4                                      | NA                                        | 0.4                            | 2.0                                        | NA                                      |
| <b>The Americas</b> |                |                |                            |                                                     |                                 |                          |                                           |                                           |                                |                                            |                                         |
| Mexico <sup>^</sup> | 2019-2020      | Mx             | 2                          | 40-69                                               | 1,125,869                       | 14.9                     | 0.9                                       | 76.2                                      | 0.4                            | 5.0                                        | NA                                      |
| Nicaragua           | 2019           | Mx             | 1-2                        | 40+                                                 | 24,218                          | 3.5                      | 2.9                                       | NA                                        | NA                             | NA                                         | NA                                      |
| Uruguay             | 2019           | Mx             | 2                          | 50-69                                               | 81,497                          | 52.9                     | 1.6                                       | NA                                        | NA                             | NA                                         | NA                                      |
| Chile               | 2019           | Mx and CBE     | 3                          | 50-69                                               | 218,363                         | 38.7                     | 0.6                                       | NA                                        | NA                             | NA                                         | NA                                      |
| <b>Europe</b>       |                |                |                            |                                                     |                                 |                          |                                           |                                           |                                |                                            |                                         |
| Austria             | 2014           | Mx             | 2                          | 50-69                                               | 196,049                         | 36.9                     | 2.4                                       | NA                                        | NA                             | NA                                         | NA                                      |
| Belgium, Brussels   | 2013           | Mx             | 2                          | 50-69                                               | 6,040                           | 10.4                     | 11.8                                      | NA                                        | 1.0                            | 5.5                                        | 9.9                                     |

|                    |      |    |     |       |           |      |      |       |     |     |      |
|--------------------|------|----|-----|-------|-----------|------|------|-------|-----|-----|------|
| Belgium, Flanders  | 2014 | Mx | 2   | 50-69 | 204,101   | 50.2 | 2.6  | 91.7  | 1.0 | 4.3 | 22.6 |
| Belgium, Wallonia  | 2013 | Mx | 2   | 50-69 | 18,063    | 8.0  | 8.5  | 88.6  | 1.2 | 5.2 | 8.5  |
| Cyprus, Nicosia    | 2013 | Mx | 2   | 50-69 | 8,091     | 42.2 | 10.1 | 79.0  | 1.0 | 2.5 | 4.4  |
| Czech Republic     | 2013 | Mx | 2   | 50-69 | 418,475   | 59.1 | 7.7  | 100   | 0.6 | 4.7 | 6.8  |
| Denmark            | 2013 | Mx | 2   | 50-69 | 257,224   | 72.0 | 2.6  | 100   | 0.6 | 6.2 | 27.3 |
| Estonia            | 2014 | Mx | 2   | 50-64 | 33,106    | 45.9 | 2.6  | NA    | 0.1 | 4.3 | NA   |
| Finland            | 2012 | Mx | 2   | 50-69 | 284,433   | 76.1 | 2.6  | 99.9  | 0.7 | 5.0 | 21.8 |
| France             | 2012 | Mx | 2   | 50-69 | 2,146,905 | 52.3 | 9.4  | 96.0  | 1.0 | 5.7 | 7.5  |
| Germany            | 2012 | Mx | 2   | 50-69 | 2,823,631 | 52.7 | 4.6  | 97.8  | 1.2 | 4.9 | 13.5 |
| Hungary            | 2013 | Mx | 2   | 50-64 | 210,887   | 38.4 | 6.1  | 91.9  | 0.4 | 3.2 | 6.4  |
| Ireland            | 2013 | Mx | 2   | 50-64 | 144,508   | 76.2 | 3.8  | 99.4  | 1.3 | 5.0 | 16.5 |
| Italy              | 2013 | Mx | 1-2 | 50-69 | 1,515,395 | 39.1 | 5.8  | 98.0  | 0.7 | 3.6 | 7.6  |
| Lithuania          | 2014 | Mx | 2   | 50-69 | 93,113    | 44.9 | 7.3  | NA    | NA  | NA  | NA   |
| Luxembourg         | 2013 | Mx | 2   | 50-69 | 17,893    | 60.4 | 6.0  | 97.9  | 1.0 | 5.4 | 10.9 |
| Malta              | 2013 | Mx | 3   | 50-69 | 7,169     | 36.4 | 10.3 | 99.2  | 1.3 | 4.9 | 6.0  |
| Netherlands        | 2013 | Mx | 2   | 50-69 | 841,444   | 77.5 | 2.3  | 98.6  | 1.4 | 4.6 | 26.3 |
| Poland             | 2013 | Mx | 2   | 50-69 | 1,141,351 | 44.0 | 4.0  | 96.0  | 0.1 | 5.9 | 15.6 |
| Portugal, Alentejo | 2013 | Mx | 2   | 50-69 | 20,589    | 41.9 | 1.6  | 94.3  | 0.4 | 1.9 | 15.0 |
| Portugal, Azores   | 2013 | Mx | 2   | 50-69 | 7,808     | 50.1 | 3.2  | 100.0 | 0.3 | 3.6 | 11.9 |

|                          |      |    |   |       |           |      |     |      |     |     |      |
|--------------------------|------|----|---|-------|-----------|------|-----|------|-----|-----|------|
| Portugal, Centre         | 2013 | Mx | 2 | 50-69 | 82,561    | 53.2 | 2.5 | 97.8 | 0   | 2.6 | 10.9 |
| Portugal, Lisboa         | 2013 | Mx | 2 | 50-69 | 25,960    | 13.6 | 1.9 | 93.7 | 0.4 | 4.4 | 27.9 |
| Portugal, Norte          | 2013 | Mx | 2 | 50-69 | 82,740    | 34.0 | 5.8 | 98.2 | 0.7 | 3.5 | 7.6  |
| Slovenia                 | 2013 | Mx | 2 | 50-69 | 25,695    | 19.1 | 3.4 | 99.7 | 2.0 | 4.1 | 18.0 |
| Spain                    | 2013 | Mx | 2 | 50-69 | 1,654,865 | 59.7 | 4.5 | 99.3 | 0.6 | 3.9 | 9.3  |
| Spain, Basque Country    | 2018 | Mx | 2 | 50-69 | 115,420   | 74.5 | 0.8 | 99.6 | 0.8 | 4.3 | 66.2 |
| Sweden Stockholm Gotland | 2013 | Mx | 2 | 50-69 | 83,451    | 70.0 | 2.4 | 98.9 | 0.9 | 5.2 | 26.0 |
| UK England               | 2013 | Mx | 3 | 50-70 | 1,874,528 | 85.5 | 3.9 | 99.2 | 1.7 | 6.7 | 21.6 |
| UK Northern Ireland      | 2013 | Mx | 3 | 50-70 | 57,110    | 80.0 | 3.4 | 99.6 | 1.0 | 5.4 | 18.7 |
| UK Scotland              | 2013 | Mx | 3 | 50-70 | 172,427   | 72.5 | 5.0 | 99.4 | 1.2 | 6.5 | 15.4 |
| UK Wales                 | 2013 | Mx | 3 | 50-70 | 101,897   | 74.4 | 4.8 | 99.3 | 2.1 | 8.1 | 21.3 |
| <b>Oceania</b>           |      |    |   |       |           |      |     |      |     |     |      |
| Australia                | 2018 | Mx | 2 | 40-74 | 1,035,907 | 41.4 | 4.8 | NA   | 1.5 | 5.8 | NA   |

Abbreviations: CIS, carcinoma in situ of breast; Mx, mammography; CBE, clinical breast examination; NA, not available; UK, United Kingdom.

# Morocco: Only invasive cancer was reported.

^ Mexico: The target population is not the total of age eligible individuals for screening.

\*Japan: Women with negative screening test receiving further assessment due to clinical recommendation were also included.

**Supplementary table S2:** Values of selected performance indicators for cervical screening programmes providing data to CanScreen5

|                     | Reporting period | Screening test (triaging test) | Screening interval (years) | Age group for which data has been collected (years) | Number screened | Examination coverage (%) | Primary test positivity (%) | Further assessment participation rate (%) | Detection rate of CIN2+ (/1000) | PPV of further assessment to detect CIN2+ (%) | Treatment rate (%) |
|---------------------|------------------|--------------------------------|----------------------------|-----------------------------------------------------|-----------------|--------------------------|-----------------------------|-------------------------------------------|---------------------------------|-----------------------------------------------|--------------------|
| <b>Africa</b>       |                  |                                |                            |                                                     |                 |                          |                             |                                           |                                 |                                               |                    |
| Côte d'Ivoire*      | 2020             | VIA (screen-and-treat)         | 3                          | 25-55                                               | 45,166          | 2.1                      | 4.2                         | NA                                        | NA                              | NA                                            | NA                 |
| Ethiopia*           | 2021             | VIA (screen-and-treat)         | 3                          | 30-49                                               | 12,570          | 2.5                      | 78.8                        | NA                                        | NA                              | NA                                            | NA                 |
| Kenya               | 2020             | Cyto                           | 5                          | 25-30, 50-65                                        | 28,860          | 2.2                      | 1.9                         | NA                                        | NA                              | NA                                            | NA                 |
| Kenya               | 2019             | VIA                            | 5                          | 25-49                                               | 300,578         | 22.4                     | 2.3                         | NA                                        | NA                              | NA                                            | NA                 |
| Morocco*            | 2019             | VIA                            | 3                          | 30-49                                               | 341,476         | 27.3                     | 3.6                         | 73.9                                      | 0.6                             | 2.1                                           | NA                 |
| Mozambique          | 2020             | VIA (screen-and-treat)         | 1                          | 25-54                                               | 1,059,470       | 23.7                     | 3.8                         | NA                                        | NA                              | NA                                            | NA                 |
| South Africa        | 2019             | Cyto (triage of ACSUS by HPV)  | 10                         | 30-50                                               | 1,025,681       | NA                       | 6.0                         | NA                                        | NA                              | NA                                            | NA                 |
| Zimbabwe            | 2020             | VIA (screen-and-treat)         | 3                          | 20-49                                               | 130,066         | 19.1                     | 5.9                         | NA                                        | NA                              | NA                                            | 54.6               |
| <b>The Americas</b> |                  |                                |                            |                                                     |                 |                          |                             |                                           |                                 |                                               |                    |
| Cuba#               | 2018             | Cyto                           | 3                          | ≤64                                                 | 866,363         | 81.7                     | 2.1                         | NA                                        | NA                              | NA                                            | NA                 |
| Guyana*             | 2019             | VIA (screen-and-treat)         | 3                          | 25-49                                               | 2,931           | NA                       | 6.2                         | NA                                        | NA                              | NA                                            | 82.3               |
| Mexico*             | 2016-2020        | HPV (cyto)                     | 5                          | 35-64                                               | 2,839,831       | 31.4                     | 11.8                        | NA                                        | 1.7                             | 10.0                                          | -                  |
| Nicaragua           | 2019             | Cyto                           | 1                          | 20+                                                 | 690,200         | 34.8                     | 3.8                         | 50.8                                      | 1.5~                            | 8.1¥                                          | 86.8               |
| Uruguay             | 2019-2021        | Cyto                           | 3                          | 21-69                                               | 740,021         | 67.3                     | 7.8                         | NA                                        | NA                              | NA                                            | NA                 |
| Chile               | 2019             | Cyto                           | 3                          | 25-64                                               | 733,630         | 55.5                     | 1.5                         | NA                                        | NA                              | NA                                            | NA                 |

## Asia

|                      |      |                                  |    |           |           |                    |     |    |      |      |    |
|----------------------|------|----------------------------------|----|-----------|-----------|--------------------|-----|----|------|------|----|
| Bangladesh           | 2019 | VIA                              | 5  | 30-60     | 387,719   | 8.8                | 4.2 | NA | 0.7^ | NA   | NA |
| Japan                | 2017 | Cyto (triage of<br>ASCUS by HPV) | 2  | 20+       | 4,294,127 | 15.7               | 2.1 | NA | 2.9  | 19.1 | NA |
| Republic of<br>Korea | 2016 | Cyto                             | 2  | 20-69     | 4,244,566 | 47.4 <sup>##</sup> | 2.7 | NA | 0.3^ | NA   | NA |
| Sri Lanka            | 2019 | Cyto                             | 10 | 35 and 45 | 160,938   | 40.8               | 0.5 | NA | NA   | NA   | NA |

## Europe

|                    |           |      |     |       |           |      |                    |                   |      |      |    |
|--------------------|-----------|------|-----|-------|-----------|------|--------------------|-------------------|------|------|----|
| Czechia            | 2013      | Cyto | 3   | 25-70 | 2,127,985 | 49.3 | 1.2                | NA                | 2.0  | NA   | NA |
| Denmark            | 2013      | Cyto | 3-5 | 23-65 | 402,561   | 82.1 | 3.4                | NA                | 12.8 | NA   | NA |
| Finland            | 2012      | Cyto | 5   | 30-64 | 164,878   | 66.0 | 0.9                | 98.8              | 2.6  | 29.3 | NA |
| Hungary            | 2013      | Cyto | 3   | 25-65 | 491,201   | 50.6 | 90.9 <sup>**</sup> | 100 <sup>**</sup> | NA   | NA   | NA |
| Italy              | 2013      | Cyto | 3   | 25-64 | 1,692,125 | 30.6 | 2.6                | 87.7              | 3.5  | 16.0 | NA |
| Latvia             | 2014      | Cyto | 3   | 25-69 | 55,487    | 26.0 | NA                 | NA                | NA   | NA   | NA |
| Netherlands        | 2009      | Cyto | 5   | 30-64 | 504,338   | 63.2 | 1.7                | 76.1              | 7.6  | 59.5 | NA |
| Poland             | 2013      | Cyto | 3   | 25-59 | 694,719   | 21.1 | 1.2                | 39.0              | 1.0  | 23.2 | NA |
| Portugal<br>Azores | 2013      | Cyto | 3   | 25-64 | 5,440     | 23.9 | NA                 | 39.5              | 3.7  | 40.8 | NA |
| Slovenia           | 2013      | Cyto | 3   | 20-64 | 164,364   | 77.4 | 0.8                | 80.7              | 4.4  | 65.4 | NA |
| Sweden             | 2013      | Cyto | 3-5 | 23-60 | 629,728   | 86.3 | 5.1                | 66.0              | 9.5  | 28.4 | NA |
| UK England         | 2013-2014 | Cyto | 3-5 | 25-64 | 3,225,180 | 79.3 | 6.2                | NA                | NA   | NA   | NA |

|                     |           |            |     |       |           |      |     |      |       |                   |    |
|---------------------|-----------|------------|-----|-------|-----------|------|-----|------|-------|-------------------|----|
| UK Northern Ireland | 2013-2014 | Cyto       | 3-5 | 25-64 | 118,893   | 85.7 | NA  | NA   | NA    | NA                | NA |
| UK Wales            | 2013      | Cyto       | 3   | 25-64 | 186,430   | 71.1 | 3.2 | 97.2 | 12.3  | 39.7              | NA |
| <b>Oceania</b>      |           |            |     |       |           |      |     |      |       |                   |    |
| Australia           | 2019      | HPV (cyto) | 5   | 25-74 | 1,886,189 | 55.8 | 8.3 | 63.2 | 5.72~ | 48.2 <sup>‡</sup> | NA |

Abbreviations: HPV, human papillomavirus; Cyto, cytology; VIA, visual inspection with acetic acid; NA, not available; UK, United Kingdom.

# Cuba: Examination coverage might be slightly over estimated, because some participants outside of the screening programme were screened.

\*Côte d'Ivoire, Ethiopia, Morocco, Guyana, Mexico: Target population is not the total of age eligible individuals for screening, the project in Guyana is at the phase of rolling-out.

^Bangladesh, Republic of Korea: The detection rate of CIN2+ was only for cervical cancer.

## Republic of Korea: Women with a previous diagnosis of cancer prior to the examination date were excluded from this screened-related data.

\*\* Hungary: Colposcopy was substantially part of the screening primary visit.

~ Nicaragua and Australia: The detection rate of CIN2+ was only for CIN3+.

‡ Nicaragua and Australia: PPV for CIN2+ was only for CIN3+.

**Supplementary table S3:** Values of selected performance indicators for colorectal cancer screening programmes providing data to CanScreen5

|                              | Reporting period | Screening test | Screening Interval (years) | Age group for which data has been collected (years) | Number of participants screened | Examination coverage (%) | Proportion advised further assessment (%) | Further assessment participation rate (%) | Detection rate of adenomas (/1000) | Detection rate of advanced adenomas (/1000) | Detection rate of invasive cancer (/1000) | PPV to detect advanced adenomas (%) | PPV to detect invasive cancer (%) |
|------------------------------|------------------|----------------|----------------------------|-----------------------------------------------------|---------------------------------|--------------------------|-------------------------------------------|-------------------------------------------|------------------------------------|---------------------------------------------|-------------------------------------------|-------------------------------------|-----------------------------------|
| <b>The Americas</b>          |                  |                |                            |                                                     |                                 |                          |                                           |                                           |                                    |                                             |                                           |                                     |                                   |
| Canada, Ontario              | 2017-2018        | FIT            | 2                          | 50-74                                               | 952,076                         | 36.8                     | 4.4                                       | 81.8                                      | NA                                 | NA                                          | 1.6                                       | NA                                  | 4.7                               |
| Uruguay                      | 2019             | FIT            | 2                          | 50-74                                               | 55,033                          | 15.7                     | 27.2                                      | NA                                        | NA                                 | NA                                          | NA                                        | NA                                  | NA                                |
| Cuba*                        | 2018             | FIT            | 1                          | 50+                                                 | 465,823                         | 11.7                     | 10.2                                      | NA                                        | NA                                 | NA                                          | NA                                        | NA                                  | NA                                |
| <b>Asia</b>                  |                  |                |                            |                                                     |                                 |                          |                                           |                                           |                                    |                                             |                                           |                                     |                                   |
| Japan                        | 2016             | FIT            | 1                          | 40+                                                 | 8,475,677                       | 11.0                     | 7.5                                       | 68.6                                      | 12.6                               | 1.9                                         | 1.8                                       | 3.7                                 | 3.5                               |
| Republic of Korea            | 2016             | FIT            | 1                          | 50-79                                               | 4,790,315                       | 29.2                     | 4.3                                       | 33.0                                      | NA                                 | NA                                          | 1.0                                       | NA                                  | 7.1                               |
| <b>Europe</b>                |                  |                |                            |                                                     |                                 |                          |                                           |                                           |                                    |                                             |                                           |                                     |                                   |
| Belgium Flemish              | 2014             | FIT            | 2                          | 50-74                                               | 317,521                         | 48.0                     | 8.1                                       | 36.3                                      | NA                                 | NA                                          | NA                                        | NA                                  | NA                                |
| Belgium (Wallonia +Brussels) | 2014             | gFOBT          | 2                          | 50-74                                               | 41,490                          | 6.5                      | 4.0                                       | 72.6                                      | 11.3                               | 4.6                                         | 1.9                                       | 15.9                                | 6.7                               |
| Croatia                      | 2014             | gFOBT          | 2                          | 50-74                                               | 101,476                         | 15.3                     | 4.0                                       | 81.9                                      | 10.6                               | NA                                          | 1.6                                       | NA                                  | 4.9                               |
| Czech Republic^              | 2013             | FIT            | 1-2                        | 50+                                                 | 535,709                         | 23.8                     | 7.4                                       | 52.8                                      | 15.3                               | 7.1                                         | 1.2                                       | 18.2                                | 3.0                               |
| Finland                      | 2014             | gFOBT          | 2                          | 60-69                                               | 59,250                          | 31.5                     | 2.9                                       | 80.6                                      | 7.0                                | 0.9                                         | 0.9                                       | 4.1                                 | 3.8                               |
| France, except Calvados      | 2012             | gFOBT          | 2                          | 50-74                                               | 2,366,408                       | 26.5                     | 2.2                                       | 84.0                                      | 6.3                                | 3.7                                         | 1.1                                       | 19.8                                | 5.6                               |
| France, Calvados             | 2012             | FIT            | 2                          | 50-74                                               | 23,795                          | 24.4                     | 3.3                                       | 87.8                                      | 10.8                               | 6.1                                         | 1.8                                       | 21.1                                | 6.3                               |
| Hungary                      | 2013             | FIT            | 2                          | 50-70                                               | 8,318                           | 0.6                      | 9.8                                       | 64.2                                      | 32.0                               | NA                                          | 3.3                                       | NA                                  | 6.1                               |



|                          |      |             |     |       |           |      |     |      |       |      |     |      |     |
|--------------------------|------|-------------|-----|-------|-----------|------|-----|------|-------|------|-----|------|-----|
| Italy                    | 2013 | FIT         | 2   | 50-69 | 1,981,349 | 33.4 | 4.8 | 77.6 | 14.2  | 7.4  | 1.3 | 19.7 | 3.5 |
| Ireland                  | 2013 | FIT         | 2   | 60-69 | 23,482    | 11.5 | 8.1 | 71.2 | 29.2  | NA   | 2.7 | NA   | 4.7 |
| Latvia                   | 2014 | gFOBT       | 1   | 50-74 | 68,498    | 11.1 | 4.1 | NA   | NA    | NA   | NA  | NA   | NA  |
| Lithuania                | 2014 | FIT         | 2   | 50-74 | 234,257   | 53.1 | 7.3 | 49.2 | NA    | NA   | NA  | NA   | NA  |
| Malta                    | 2014 | FIT         | 2   | 60-64 | 6,754     | 45.4 | 4.3 | 66.2 | 17.2  | NA   | 2.2 | NA   | 7.8 |
| Netherlands              | 2014 | FIT         | 2   | 55-75 | 529,056   | 64.5 | 7.8 | 79.2 | 35.6  | 23.0 | 4.7 | 37.9 | 7.8 |
| Slovenia                 | 2012 | FIT         | 2   | 50-69 | 126,327   | 47.1 | 6.0 | 92.2 | 28.1  | 17.3 | 1.9 | 31.2 | 3.4 |
| Spain                    | 2013 | FIT         | 2   | 50-69 | 449,868   | 14.8 | 6.7 | 90.7 | 33.4  | 22.9 | 3.0 | 37.8 | 4.9 |
| Spain, Basque Country    | 2018 | FIT         | 2   | 50-69 | 192,791   | 64.1 | 4.4 | 94.4 | 8.6   | 15.1 | 1.4 | 36.5 | 3.3 |
| Sweden Stockholm Gotland | 2013 | gFOBT       | 2   | 60-69 | 70,410    | 62.7 | 3.5 | 89.4 | 7.5   | 3.7  | 1.0 | 8.5  | 3.3 |
| Czech Republic^          | 2013 | Colonoscopy | 10  | 55+   | 4,504     | 1.4  | NA  | 97.6 | 277.3 | 80.8 | 9.1 | NA   | NA  |
| Poland                   | 2013 | Colonoscopy | 10+ | 55-64 | 9,312     | 5.1  | NA  | 96.9 | 281.1 | 57.2 | 5.5 | NA   | NA  |
| UK England               | 2013 | gFOBT       | 2   | 60-74 | 2,171,029 | 54.9 | 1.8 | 83.4 | 5.4   | 1.5  | 1.3 | 10.0 | 8.6 |
| UK Northern Ireland      | 2013 | gFOBT       | 2   | 60-74 | 66,051    | 53.6 | 2.5 | 81.7 | 9.5   | NA   | 1.6 | NA   | 8.1 |
| UK Scotland              | 2013 | gFOBT       | 2   | 50-74 | 491,531   | 62.8 | 2.1 | 82.6 | 6.2   | 0.8  | 1.1 | 5.0  | 6.9 |
| UK Wales                 | 2013 | gFOBT       | 2   | 60-74 | 140,156   | 54.3 | 2.2 | 82.6 | 4.2   | NA   | 1.4 | NA   | 7.9 |
| <b>Oceania</b>           |      |             |     |       |           |      |     |      |       |      |     |      |     |
| Australia                | 2018 | FIT         | 2   | 50-74 | 1,075,391 | 42.4 | 7.3 | 65.5 | 3.0   | 2.7  | 0.2 | 5.6  | 0.5 |

Abbreviations: FIT: fecal immunochemical test; gFOBT: guaiac based faecal occult blood test; NA: not available; UK: United Kingdom.

\*Cuba: It was not possible to separate number of individuals screened opportunistically outside the programme. Coverage may have been over-estimated.

^Czech Republic: Examination coverage is underestimated in programme-specific age ranges because screened persons aged over 79 years are not reported.

**Supplementary table S4:** Key performance indicators for cancer screening and their definitions used in CanScreen5 project

|                                                                                                                                                            |                                                                                                                                                                                                                                                                   |
|------------------------------------------------------------------------------------------------------------------------------------------------------------|-------------------------------------------------------------------------------------------------------------------------------------------------------------------------------------------------------------------------------------------------------------------|
| <b>All the performance cancer screening indicators should be calculated for a specific time frame, the defined screening round or the reporting period</b> |                                                                                                                                                                                                                                                                   |
| <b>Examination coverage (%)</b>                                                                                                                            | $\frac{\text{Number of individuals screened of the eligible population (as defined by the programme protocol) in a specific time frame}}{\text{Number of eligible population (as defined by the programme protocol) in the same specific time frame}} \times 100$ |
| <b>Proportion advised further assessment (%)</b>                                                                                                           | $\frac{\text{Number of individuals with positive test outcome requiring further investigations in a specific time frame}}{\text{Number of participants screened for whom test outcomes are available in the same specific time frame}} \times 100$                |
| <b>Further assessment participation rate (%)</b>                                                                                                           | $\frac{\text{Number of individuals undergone further assessment in a specific time frame}}{\text{Number of individuals with positive test outcome requiring further assessment in the same specific time frame}} \times 100$                                      |
| <b>Detection rate (/1,000)</b>                                                                                                                             | $\frac{\text{Number of individuals with pathologically proven precancer/cancer detected in a specific time frame}}{\text{Number of individuals screened in the same specific time frame}} \times 1,000$                                                           |
| <b>Positive predictive value (PPV) of the screening test (/100)</b>                                                                                        | $\frac{\text{Number of individuals with pathologically proven precancer/cancer detected in a specific time frame}}{\text{Number of screen positive individuals with further assessment performed in the same specific time frame}} \times 100$                    |
| <b>Treatment rate (%)</b>                                                                                                                                  | $\frac{\text{Number of individuals treated for precancer/cancer detected in a specific time frame}}{\text{Number of individuals with pathologically proven precancer/cancer detected in the same specific time frame}} \times 100$                                |

**Supplementary table S5:** Information on policy, protocol and organisation of breast cancer screening programmes by World Bank income classification of countries

|                                                                                     |                                     | Low<br>income<br>(N=1) | Lower<br>middle<br>income<br>(N=7) | Upper middle<br>income (N=15) | High income<br>(N=34) |
|-------------------------------------------------------------------------------------|-------------------------------------|------------------------|------------------------------------|-------------------------------|-----------------------|
| <b>Programme policy, initiation, coordination, and financing</b>                    |                                     |                        |                                    |                               |                       |
| Whether policy is documented as a law or only as a notification or a recommendation | As a law                            | 0                      | 1(14.3)                            | 2(13.3)                       | 14 (41.2)             |
|                                                                                     | As a notification or recommendation | 1 (100)                | 6 (85.7)                           | 13 (86.7)                     | 20 (58.8)             |
| Year of initiation of the programme                                                 | Before 2000                         | 0                      | 2 (28.6)                           | 1 (6.7)                       | 14 (41.2)             |
|                                                                                     | 2000 or later                       | 1 (100)                | 4 (57.1)                           | 10 (66.7)                     | 18 (52.9)             |
|                                                                                     | Cannot specify                      | 0                      | 1 (14.3)                           | 4 (26.7)                      | 2 (5.9)               |
| Whether an individual/team/institution is responsible for programme implementation  | Yes                                 | 1 (100)                | 7 (100)                            | 13 (86.7)                     | 31 (91.2)             |
|                                                                                     | No                                  | 0                      | 0                                  | 2 (13.3)                      | 2 (5.9)               |
|                                                                                     | Unknown                             | 0                      | 0                                  | 0                             | 1 (2.9)               |
| Whether budget is allocated for the programme                                       | Yes                                 | 1 (100)                | 6 (85.7)                           | 10 (66.7)                     | 31 (91.2)             |
|                                                                                     | No                                  | 0                      | 1 (14.3)                           | 5 (33.3)                      | 2 (5.9)               |
|                                                                                     | Unknown                             | 0                      | 0                                  | 0                             | 1 (2.9)               |
| Whether screening tests are available free of charge                                | Yes                                 | 1 (100)                | 6 (85.7)                           | 12 (80.0)                     | 31 (91.2)             |
|                                                                                     | No                                  | 0                      | 1 (14.3)                           | 3 (20.0)                      | 2 (5.9)               |
|                                                                                     | Unknown                             | 0                      | 0                                  | 0                             | 1 (2.9)               |
| Whether diagnostic tests are available free of charge                               | Yes                                 | 1 (100)                | 3 (42.9)                           | 10 (66.7)                     | 24 (70.6)             |
|                                                                                     | No                                  | 0                      | 4 (57.1)                           | 5 (33.3)                      | 9 (26.5)              |
|                                                                                     | Unknown                             | 0                      | 0                                  | 0                             | 1 (2.9)               |
| <b>Screening test</b>                                                               |                                     |                        |                                    |                               |                       |
| Primary screening test                                                              | Mx                                  | 0                      | 2 (28.6)                           | 7 (46.7)                      | 33 (97.1)             |
|                                                                                     | Mx&US                               | 0                      | 0                                  | 0                             | 1 (2.9)               |
|                                                                                     | Mx/CBE#                             | 0                      | 0                                  | 3 (20.0)                      | 0                     |
|                                                                                     | Mx&CBE                              | 0                      | 0                                  | 0                             | 0                     |
|                                                                                     | CBE                                 | 1 (100)                | 4 (57.1)                           | 3 (20.0)                      | 0                     |
|                                                                                     | CBE & US                            | 0                      | 0                                  | 1 (6.7)                       | 0                     |
|                                                                                     | CBE/CBE&US/CBE&Mx/Mx&(CBE/US)#      | 0                      | 1 (14.3)                           | 0                             | 0                     |
|                                                                                     | US                                  | 0                      | 0                                  | 1 (6.7)                       | 0                     |
|                                                                                     | Yes, all mammograms                 | 0                      | 0                                  | 1 (6.7)                       | 23 (67.6)             |
| Whether mammograms are read by two radiologists independently                       | Yes, negative mammograms only       | 0                      | 0                                  | 0                             | 1 (2.9)               |
|                                                                                     | No                                  | 0                      | 3 (42.9)                           | 7 (46.7)                      | 7 (20.6)              |
|                                                                                     | Not applicable                      | 1 (100)                | 4 (57.1)                           | 5 (33.3)                      | 0                     |
|                                                                                     | Unknown                             | 0                      | 0                                  | 2 (13.3)                      | 3 (8.8)               |
| <b>Invitations and recall facilities</b>                                            |                                     |                        |                                    |                               |                       |
| Whether a system of inviting eligible individuals exists                            | Yes                                 | 0                      | 2 (28.6)                           | 4 (26.7)                      | 29 (85.3)             |
|                                                                                     | No                                  | 1 (100)                | 5 (71.4)                           | 11 (73.3)                     | 4 (11.8)              |
|                                                                                     | Unknown                             | 0                      | 0                                  | 0                             | 1 (2.9)               |
| Whether screen-positive women are actively contacted                                | Yes                                 | 1 (100)                | 4 (57.1)                           | 8 (53.3)                      | 29 (85.3)             |
|                                                                                     | No                                  | 0                      | 3 (42.9)                           | 7 (46.7)                      | 3 (8.8)               |
|                                                                                     | Unknown                             | 0                      | 0                                  | 0                             | 2 (5.9)               |
| <b>Information system and data collection</b>                                       |                                     |                        |                                    |                               |                       |
| Whether data is collected for programme monitoring                                  | Individual data collected           | 0                      | 4 (57.1)                           | 9 (60.0)                      | 29 (85.3)             |
|                                                                                     | Only aggregated data collected      | 1 (100)                | 2 (28.6)                           | 3 (20.0)                      | 2 (5.9)               |
|                                                                                     | No data is collected                | 0                      | 1 (14.3)                           | 3 (20.0)                      | 3 (8.8)               |
| Whether screening data is linked with population-based cancer registries (PBCR)     | Yes                                 | 0                      | 1 (14.3)                           | 1 (6.7)                       | 26 (76.5)             |
|                                                                                     | PBCR exists but not linked          | 1 (100)                | 4 (57.1)                           | 11 (73.3)                     | 7 (20.6)              |
|                                                                                     | No PBCR                             | 0                      | 2 (28.6)                           | 3 (20.0)                      | 0                     |

|                                                                                  |         |         |          |           |           |
|----------------------------------------------------------------------------------|---------|---------|----------|-----------|-----------|
|                                                                                  | Unknown | 0       | 0        | 0         | 1 (2.9)   |
| <b>Quality Assurance (QA) of programme</b>                                       |         |         |          |           |           |
| Whether a documented protocol for quality assurance exists                       | Yes     | 0       | 4 (57.1) | 8 (53.3)  | 22 (64.7) |
|                                                                                  | No      | 1 (100) | 3 (42.9) | 7 (46.7)  | 4 (11.8)  |
|                                                                                  | Unknown | 0       | 0        | 0         | 8 (23.5)  |
| Whether an individual or a team/institution is responsible for quality assurance | Yes     | 1 (100) | 5 (71.4) | 11 (73.3) | 30 (88.2) |
|                                                                                  | No      | 0       | 2 (28.6) | 4 (26.7)  | 2 (5.9)   |
|                                                                                  | Unknown | 0       | 0        | 0         | 2 (5.9)   |
| Whether monitoring is done using specified performance indicators                | Yes     | 1 (100) | 5 (71.4) | 8 (53.3)  | 23 (67.6) |
|                                                                                  | No      | 0       | 2 (28.6) | 7 (46.7)  | 3 (8.8)   |
|                                                                                  | Unknown | 0       | 0        | 0         | 8 (23.5)  |
| Whether performance report of the programme is published                         | Yes     | 1 (100) | 1 (14.3) | 5 (33.3)  | 24 (70.6) |
|                                                                                  | No      | 0       | 6 (85.7) | 10 (66.7) | 9 (26.5)  |
|                                                                                  | Unknown | 0       | 0        | 0         | 1 (2.9)   |

CBE: clinical breast examination; Mx: Mammography; US: ultrasound

\* Canada reported regional programme for Manitoba, China reported regional programme for Henan Province and the city of Tianjin, India reported regional programme for Assam state, and Spain reported the national and a regional programme.

# Different primary tests used depending on age and local health settings

**Supplementary table S6:** Information on policy, protocol and organisation of cervical cancer screening programmes by income level

|                                                                                     |                                            | Low income<br>(N=6) | Lower middle income (N=13) | Upper middle income<br>(N=21) | High income<br>(N=35) |
|-------------------------------------------------------------------------------------|--------------------------------------------|---------------------|----------------------------|-------------------------------|-----------------------|
| <b>Programme policy, initiation, coordination, and financing</b>                    |                                            |                     |                            |                               |                       |
| Whether policy is documented as a law or only as a notification or a recommendation | As a law                                   | 0                   | 1 (7.7)                    | 2 (9.5)                       | 9 (25.7)              |
|                                                                                     | As a notification or recommendation        | 6 (100)             | 12 (92.3)                  | 19 (90.5)                     | 26 (74.3)             |
| Year of initiation of the programme                                                 | Before 2000                                | 0                   | 4 (30.8)                   | 4 (19.0)                      | 14 (40.0)             |
|                                                                                     | 2000 or afterwards                         | 6 (100)             | 7 (53.8)                   | 13 (61.9)                     | 17 (48.6)             |
|                                                                                     | Unknown                                    | 0                   | 2 (15.4)                   | 4 (19.0)                      | 4 (11.4)              |
| Whether an individual/team/institution is responsible for programme implementation  | Yes                                        | 6 (100)             | 10 (76.9)                  | 19 (90.5)                     | 28 (80.0)             |
|                                                                                     | No                                         | 0                   | 3 (23.1)                   | 2 (9.5)                       | 4 (11.4)              |
|                                                                                     | Unknown                                    | 0                   | 0                          | 0                             | 3 (8.6)               |
| Whether budget is allocated for the programme                                       | Yes                                        | 4 (66.7)            | 9 (69.2)                   | 15 (71.4)                     | 30 (85.7)             |
|                                                                                     | No                                         | 2 (33.3)            | 4 (30.8)                   | 6 (28.6)                      | 2 (5.7)               |
|                                                                                     | Unknown                                    | 0                   | 0                          | 0                             | 3 (8.6)               |
| Whether screening tests are available free of charge                                | Yes                                        | 6 (100)             | 10 (76.9)                  | 18 (85.7)                     | 32 (91.4)             |
|                                                                                     | No                                         | 0                   | 3 (23.1)                   | 3 (14.3)                      | 2 (5.7)               |
|                                                                                     | Unknown                                    | 0                   | 0                          | 0                             | 1 (2.9)               |
| Whether diagnostic tests are available free of charge                               | Yes                                        | 3 (50.0)            | 5 (38.5)                   | 17 (81.0)                     | 22 (62.9)             |
|                                                                                     | No                                         | 3 (50.0)            | 8 (61.5)                   | 4 (19.0)                      | 11 (31.4)             |
|                                                                                     | Unknown                                    | 0                   | 0                          | 0                             | 2 (5.7)               |
| <b>Screening test</b>                                                               |                                            |                     |                            |                               |                       |
| Primary screening test                                                              | VIA                                        | 3 (50.0)            | 7 (53.8)                   | 1 (4.8)                       | 0                     |
|                                                                                     | Cytology                                   | 0                   | 2 (15.4)                   | 8 (38.1)                      | 22 (62.8)             |
|                                                                                     | HPV detection                              | 0                   | 0                          | 1 (4.8)                       | 1 (2.9)               |
|                                                                                     | VIA/Cytology <sup>#</sup>                  | 0                   | 2 (15.4)                   | 5 (23.8)                      | 0                     |
|                                                                                     | VIA/HPV detection <sup>#</sup>             | 3 (50.0)            | 0                          | 0                             | 0                     |
|                                                                                     | VIA/Cytology/HPV detection <sup>#</sup>    | 0                   | 0                          | 4 (19.0)                      | 0                     |
|                                                                                     | Cytology/HPV detection <sup>#</sup>        | 0                   | 2 (15.4)                   | 2 (9.5)                       | 8 (22.9)              |
|                                                                                     | Cytology/Co-test (HPV + cyto) <sup>#</sup> | 0                   | 0                          | 0                             | 3 (8.6)               |
|                                                                                     | Cytology/HPV/Co-test <sup>#</sup>          | 0                   | 0                          | 0                             | 1 (2.9)               |
| <b>Invitations and recall facilities</b>                                            |                                            |                     |                            |                               |                       |
| Whether a system of inviting eligible individuals exists                            | Yes                                        | 0                   | 4 (30.8)                   | 4 (19.0)                      | 24 (68.6)             |
|                                                                                     | No                                         | 6 (100)             | 9 (69.2)                   | 17 (81.0)                     | 7 (20)                |
|                                                                                     | Unknown                                    | 0                   | 0                          | 0                             | 4 (11.4)              |
| Whether screen-positive women are actively contacted                                | Yes                                        | 6 (100)             | 9 (69.2)                   | 12 (57.1)                     | 20 (57.1)             |
|                                                                                     | No                                         | 0                   | 4 (30.8)                   | 9 (42.9)                      | 11 (31.4)             |
|                                                                                     | Unknown                                    | 0                   | 0                          | 0                             | 4 (11.4)              |
| <b>Information system and data collection</b>                                       |                                            |                     |                            |                               |                       |
| Whether data is collected for programme monitoring                                  | On individual basis                        | 2 (33.3)            | 6 (46.2)                   | 11 (52.4)                     | 26 (74.3)             |
|                                                                                     | Aggregated data only                       | 4 (66.7)            | 6 (46.2)                   | 8 (38.1)                      | 3 (8.6)               |
|                                                                                     | No data is collected                       | 0                   | 1 (7.7)                    | 2 (9.5)                       | 1 (2.9)               |
|                                                                                     | Unknown                                    | 0                   | 0                          | 0                             | 5 (14.3)              |
|                                                                                     |                                            | Low income<br>(N=6) | Lower middle income (N=13) | Upper middle income<br>(N=21) | High income<br>(N=35) |
| Whether screening data is linked with population-based cancer registries (PBCR)     | Yes                                        | 0                   | 1 (7.7)                    | 0                             | 22 (62.9)             |
|                                                                                     | PBCR exists but not linked                 | 4 (66.7)            | 8 (61.5)                   | 16 (76.2)                     | 11 (31.4)             |
|                                                                                     | No PBCR                                    | 2 (33.3)            | 4 (30.8)                   | 5 (23.8)                      | 0                     |

|                                                                                  |         |          |           |           |           |
|----------------------------------------------------------------------------------|---------|----------|-----------|-----------|-----------|
|                                                                                  | Unknown | 0        | 0         | 0         | 2 (5.7)   |
| <b>Quality Assurance (QA) of screening activities</b>                            |         |          |           |           |           |
| Whether a documented protocol for quality assurance exists                       | Yes     | 4 (66.7) | 4 (30.8)  | 16 (76.2) | 22 (62.9) |
|                                                                                  | No      | 2 (33.3) | 9 (69.2)  | 5 (23.8)  | 2 (5.7)   |
|                                                                                  | Unknown | 0        | 0         | 0         | 11 (31.4) |
| Whether an individual or a team/institution is responsible for quality assurance | Yes     | 4 (66.7) | 6 (46.2)  | 13 (61.9) | 25 (71.4) |
|                                                                                  | No      | 2 (33.3) | 7 (53.8)  | 7 (33.3)  | 5 (14.3)  |
|                                                                                  | Unknown | 0        | 0         | 1 (4.8)   | 5 (14.3)  |
| Whether monitoring is done using specified performance indicators                | Yes     | 5 (83.3) | 10 (76.9) | 17 (81.0) | 23 (65.7) |
|                                                                                  | No      | 1 (16.7) | 3 (23.1)  | 4 (19.0)  | 1 (2.9)   |
|                                                                                  | Unknown | 0        | 0         | 0         | 11 (31.4) |
| Whether performance report of the programme is published                         | Yes     | 3 (50.0) | 2 (15.4)  | 8 (38.1)  | 23 (65.7) |
|                                                                                  | No      | 3 (50.0) | 11 (84.6) | 13 (61.9) | 10 (28.6) |
|                                                                                  | Unknown | 0        | 0         | 0         | 2 (5.7)   |

Abbreviations: HPV, human papillomavirus; Cyto, cytology; VIA, visual inspection with acetic acid; NA, not available.

\* China reported regional programme for Henan Province, India reported regional programme for Assam state, and Canada reported regional programme for Manitoba, and Romania and Spain reported the national and a regional programme.

# Different primary tests were used depending on age and local health setting.

**Supplementary table S7:** Information on policy, protocol and organisation of colorectal cancer screening programmes by income level

|                                                                                       |                             | Upper middle income (N=8) | High income (N=43) |
|---------------------------------------------------------------------------------------|-----------------------------|---------------------------|--------------------|
| <b>Programme policy, initiation, coordination, and financing</b>                      |                             |                           |                    |
| Whether policy is documented as a law or only as a notification or a recommendation   | Law                         | 2(25.0)                   | 9(20.9)            |
|                                                                                       | Notification/recommendation | 6 (75.0)                  | 34 (79.1)          |
| Year of initiation of the programme                                                   | Before 2000                 | 0                         | 3 (7.0)            |
|                                                                                       | 2000 or afterwards          | 7 (87.5)                  | 38 (88.4)          |
|                                                                                       | Unknown                     | 1 (12.5)                  | 2 (4.7)            |
|                                                                                       |                             |                           |                    |
| Whether an individual/team/ institution is responsible for programme implementation   | Yes                         | 8 (100)                   | 40 (93.0)          |
|                                                                                       | No                          | 0                         | 1 (2.3)            |
|                                                                                       | Unknown                     | 0                         | 2 (4.7)            |
| Whether budget is allocated for the programme                                         | Yes                         | 6 (75.0)                  | 38(88.4)           |
|                                                                                       | No                          | 2 (25.0)                  | 3 (7.0)            |
|                                                                                       | Unknown                     | 0                         | 2 (4.7)            |
| Whether screening tests are available free of charge                                  | Yes                         | 8 (100)                   | 39 (90.7)          |
|                                                                                       | No                          | 0                         | 3 (7.0)            |
|                                                                                       | Unknown                     | 0                         | 1 (2.3)            |
| Whether diagnostic tests are available free of charge                                 | Yes                         | 5 (62.5)                  | 33 (76.7)          |
|                                                                                       | No                          | 3 (37.5)                  | 9 (20.9)           |
|                                                                                       | Unknown                     | 0                         | 1 (2.3)            |
| <b>Screening protocol</b>                                                             |                             |                           |                    |
| Primary screening test                                                                | FIT                         | 5 (62.5)                  | 28 (65.1)          |
|                                                                                       | gFOBT                       | 0                         | 8 (18.6)           |
|                                                                                       | FIT / gFOBT                 | 1 (12.5)                  | 1 (2.3)            |
|                                                                                       | colonoscopy                 | 1 (12.5)                  | 1 (2.3)            |
|                                                                                       | FIT / colonoscopy           | 1 (12.5)                  | 3 (7.0)            |
|                                                                                       | gFOBT / colonoscopy         | 0                         | 1 (2.3)            |
|                                                                                       | FIT / gFOBT / colonoscopy   | 0                         | 1 (2.3)            |
| <b>Invitations for screening and recall for further assessment</b>                    |                             |                           |                    |
| A system of inviting eligible individuals                                             | Yes                         | 2 (25.0)                  | 32 (74.4)          |
|                                                                                       | No                          | 6 (75.0)                  | 10 (23.3)          |
|                                                                                       | Unknown                     | 0                         | 1 (2.3)            |
| Screen-positive individuals are actively contacted                                    | Yes                         | 7 (87.5)                  | 34 (79.1)          |
|                                                                                       | No                          | 1 (12.5)                  | 7 (16.3)           |
|                                                                                       | Unknown                     | 0                         | 2 (4.7)            |
| <b>Information system and data collection</b>                                         |                             |                           |                    |
| Whether data is collected for programme monitoring                                    | On individual basis         | 4 (50.0)                  | 36 (83.7)          |
|                                                                                       | Aggregated data only        | 4 (50.0)                  | 4 (9.3)            |
|                                                                                       | No data collected           | 0                         | 1 (2.3)            |
|                                                                                       | Unknown                     | 0                         | 2 (4.7)            |
| Countries having screening data linked with population-based cancer registries (PBCR) | Yes                         | 0                         | 25 (58.1)          |
|                                                                                       | PBCR exists but not linked  | 8 (100)                   | 17 (39.5)          |
|                                                                                       | Unknown                     | 0                         | 1 (2.3)            |
| <b>Quality Assurance (QA) of screening activities</b>                                 |                             |                           |                    |
| Whether a documented protocol for quality assurance exists                            | Yes                         | 5 (62.5)                  | 25 (58.1)          |
|                                                                                       | No                          | 3 (37.5)                  | 4 (9.3)            |
|                                                                                       | Unknown                     | 0                         | 14 (32.6)          |
|                                                                                       | Yes                         | 7 (87.5)                  | 36 (83.7)          |

|                                                                                  |         |          |           |
|----------------------------------------------------------------------------------|---------|----------|-----------|
| Whether an individual or a team/institution is responsible for quality assurance | No      | 1 (12.5) | 6 (14.0)  |
|                                                                                  | Unknown | 0        | 1 (2.3)   |
| Whether monitoring is done using specified performance indicators                | Yes     | 7 (87.5) | 26 (60.5) |
|                                                                                  | No      | 1 (12.5) | 3 (7.0)   |
|                                                                                  | Unknown | 0        | 14 (32.6) |
| Whether performance report of the programme is published                         | Yes     | 3 (37.5) | 32 (74.4) |
|                                                                                  | No      | 5 (62.5) | 10 (23.3) |
|                                                                                  | Unknown | 0        | 1 (2.3)   |

Abbreviations: FIT, fecal immunochemical test; gFOBT, guaiac based faecal occult blood test; NA, not available.

\* China reported regional programme for Henan Province, Canada reported regional programme for 11 provinces. individually, and Spain reported a national and a regional program.
